# Supplementary material for: Sound: a non-invasive measure of cough intensity
Source: PubMed Central journal article supplement — BMJ Open Respir Res. 2017 May 12;4(1):e000178. doi: 10.1136/bmjresp-2017-000178 (PMC5501240; doi:10.1136/bmjresp-2017-000178), 2017-05-12
Supplement: bmjresp-2017-000178supp001.pdf [file bmjresp-2017-000178supp001.pdf]

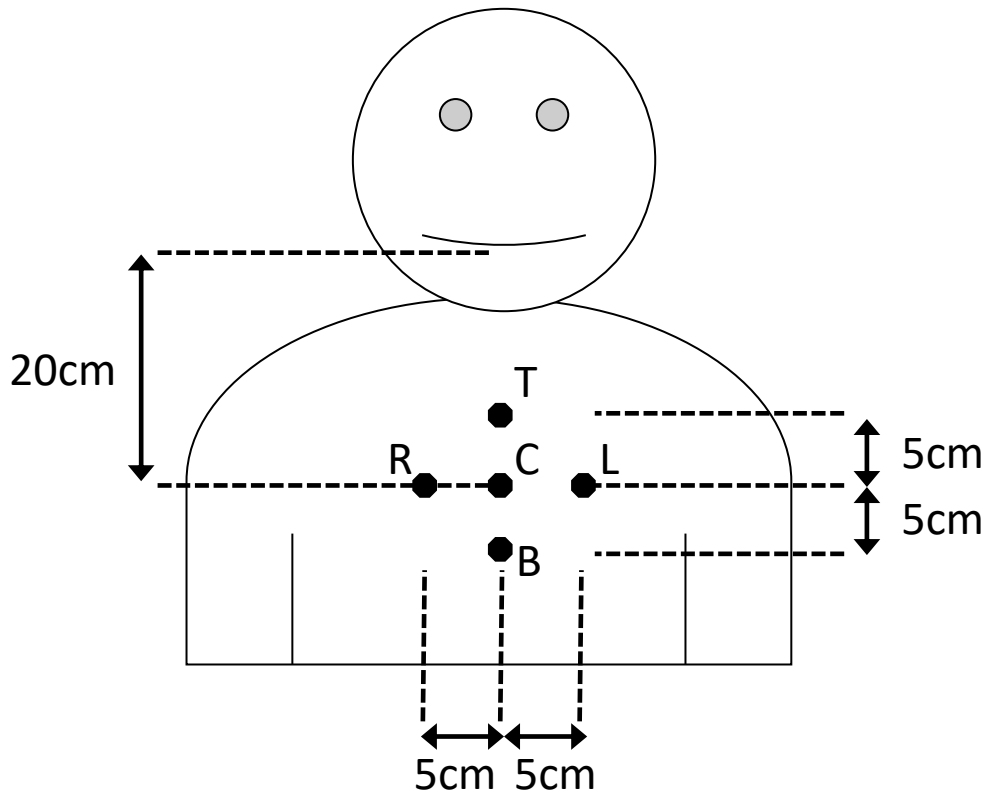

**Supplementary Figure 1. Figure depicting various microphone positions to assess effect on cough sound measures.** Centre microphone positioned 20cm inferiorly to mouth. T: top; C: centre; B: bottom; L: left; R: right.
