# Supplementary material for: Sound: a non-invasive measure of cough intensity
Source: PubMed Central journal article supplement — BMJ Open Respir Res. 2017 May 12;4(1):e000178. doi: 10.1136/bmjresp-2017-000178 (PMC5501240; doi:10.1136/bmjresp-2017-000178), 2017-05-12
Supplement: bmjresp-2017-000178supp002.pdf [file bmjresp-2017-000178supp002.pdf]

## ONLINE SUPPLEMENTARY TABLES

**Table 1. The relationship between P<sub>1</sub> cough sound from Free-field microphone, flow and oesophageal pressure**

### a) Flow

| P <sub>1</sub> sound parameter | All subjects            | All females             | All males               | Chronic coughers        | Controls                |
|--------------------------------|-------------------------|-------------------------|-------------------------|-------------------------|-------------------------|
| <b>PW</b>                      | <b>0.88 (0.78-0.93)</b> | <b>0.83 (0.78-0.92)</b> | <b>0.92 (0.87-0.95)</b> | <b>0.79 (0.76-0.92)</b> | <b>0.89 (0.85-0.95)</b> |
| <b>Ep</b>                      | <b>0.87 (0.78-0.92)</b> | <b>0.84 (0.77-0.89)</b> | <b>0.91 (0.86-0.96)</b> | <b>0.82 (0.76-0.92)</b> | <b>0.89 (0.86-0.95)</b> |
| <b>RT</b>                      | 0.31 (0.02-0.48)        | 0.29 (0.05-0.42)        | 0.33 (-0.02-0.48)       | 0.28 (-0.08-0.43)       | 0.41 (0.12-0.48)        |
| <b>D</b>                       | 0.29 (-0.11-0.59)       | 0.15 (-0.21-0.60)       | 0.43 (-0.11-0.62)       | 0.47 (-0.08-0.69)       | 0.02 (-0.17-0.43)       |
| <b>Fp</b>                      | 0.11 (-0.25-0.34)       | 0.18 (-0.24-0.34)       | 0.10 (-0.28-0.49)       | 0.03 (-0.22-0.32)       | 0.28 (-0.27-0.45)       |
| <b>BW</b>                      | -0.24 (-0.53-0.11)      | -0.22 (-0.54-0.11)      | -0.41 (-0.57-0.09)      | -0.26 (-0.63-0.02)      | -0.16 (-0.53-0.11)      |
| <b>Fc</b>                      | 0.49 (0.25-0.71)        | 0.47 (0.18-0.68)        | 0.61 (0.29-0.75)        | 0.47 (0.21-0.67)        | 0.62 (0.24-0.83)        |

### b) Oesophageal pressure

| P <sub>1</sub> sound parameter | All subjects            | All females             | All males               | Chronic coughers        | Controls                |
|--------------------------------|-------------------------|-------------------------|-------------------------|-------------------------|-------------------------|
| <b>PW</b>                      | <b>0.89 (0.84-0.95)</b> | <b>0.87 (0.81-0.91)</b> | <b>0.94 (0.88-0.96)</b> | <b>0.88 (0.85-0.94)</b> | <b>0.91 (0.82-0.95)</b> |
| <b>Ep</b>                      | <b>0.89 (0.82-0.95)</b> | <b>0.84 (0.81-0.91)</b> | <b>0.94 (0.88-0.96)</b> | <b>0.84 (0.81-0.94)</b> | <b>0.91 (0.86-0.95)</b> |
| <b>RT</b>                      | 0.35 (-0.04-0.45)       | 0.35 (-0.02-0.42)       | 0.40 (-0.06-0.48)       | 0.35 (-0.14-0.45)       | 0.36 (0.07-0.46)        |
| <b>D</b>                       | 0.23 (-0.11-0.54)       | 0.10 (-0.26-0.51)       | 0.37 (-0.07-0.61)       | 0.51 (-0.03-0.55)       | -0.05 (-0.26-0.42)      |
| <b>Fp</b>                      | 0.06 (-0.30-0.41)       | 0.16 (-0.3-0.43)        | 0.00 (-0.31-0.53)       | 0.05 (-0.31-0.38)       | 0.08 (-0.29-0.47)       |
| <b>BW</b>                      | -0.40 (-0.58-0.10)      | -0.43 (-0.59-0.10)      | -0.34 (-0.64-0.11)      | -0.34 (-0.70-0.10)      | -0.43 (-0.52-0.11)      |
| <b>Fc</b>                      | 0.53 (0.22-0.76)        | 0.52 (0.20-0.80)        | 0.64 (0.26-0.76)        | 0.52 (0.24-0.78)        | 0.64 (0.22-0.76)        |

Data presented as median (IQR) within-subject Spearman's correlation coefficients between P<sub>1</sub> cough sound and cough flow (a) or oesophageal pressure (b). Peak cough flow normalised to predicted peak expiratory flow. PW: power; Ep: peak energy; RT: rise time; D: duration; Fp: peak frequency; BW: bandwidth; Fc: centroid frequency.

**Table 2. The relationship between P<sub>1</sub> cough sound from Contact microphone, flow and oesophageal pressure**

a) Flow

| P <sub>1</sub> sound parameter | All subjects            | All females             | All males               | Chronic coughers        | Controls                |
|--------------------------------|-------------------------|-------------------------|-------------------------|-------------------------|-------------------------|
| <b>PW</b>                      | <b>0.82 (0.71-0.91)</b> | <b>0.79 (0.68-0.89)</b> | <b>0.89 (0.78-0.93)</b> | <b>0.82 (0.74-0.91)</b> | <b>0.81 (0.68-0.89)</b> |
| <b>Ep</b>                      | <b>0.83 (0.74-0.90)</b> | <b>0.80 (0.72-0.89)</b> | <b>0.89 (0.82-0.92)</b> | <b>0.82 (0.75-0.90)</b> | <b>0.84 (0.72-0.89)</b> |
| <b>RT</b>                      | 0.20 (-0.06-0.35)       | 0.19 (-0.09-0.33)       | 0.21 (0.05-0.46)        | 0.15 (-0.09-0.43)       | 0.21 (0.14-0.33)        |
| <b>D</b>                       | 0.29 (-0.11-0.59)       | 0.15 (-0.21-0.60)       | 0.43 (-0.11-0.62)       | 0.47 (-0.08-0.69)       | 0.02 (-0.17-0.43)       |
| <b>Fp</b>                      | 0.20 (-0.19-0.62)       | 0.15 (-0.21-0.39)       | 0.57 (0.01-0.76)        | 0.17 (-0.17-0.52)       | 0.39 (-0.21-0.72)       |
| <b>BW</b>                      | -0.09 (-0.46-0.33)      | -0.17 (-0.48-0.08)      | 0.03 (-0.24-0.41)       | -0.09 (-0.52-0.23)      | 0.01 (-0.42-0.33)       |
| <b>Fc</b>                      | 0.68 (0.33-0.86)        | 0.49 (0.10-0.71)        | 0.86 (0.70-0.91)        | 0.62 (0.36-0.72)        | 0.81 (0.11-0.92)        |

b) Oesophageal pressure

| P <sub>1</sub> sound parameter | All subjects            | All females             | All males               | Chronic coughers        | Controls                |
|--------------------------------|-------------------------|-------------------------|-------------------------|-------------------------|-------------------------|
| <b>PW</b>                      | <b>0.86 (0.76-0.90)</b> | <b>0.83 (0.70-0.88)</b> | <b>0.90 (0.86-0.94)</b> | <b>0.88 (0.81-0.92)</b> | <b>0.83 (0.68-0.90)</b> |
| <b>Ep</b>                      | <b>0.86 (0.79-0.90)</b> | <b>0.83 (0.75-0.89)</b> | <b>0.90 (0.87-0.93)</b> | <b>0.89 (0.82-0.92)</b> | <b>0.84 (0.75-0.90)</b> |
| <b>RT</b>                      | 0.21 (-0.07-0.42)       | 0.21 (-0.08-0.45)       | 0.28 (0.06-0.48)        | 0.22 (-0.12-0.48)       | 0.20 (0.03-0.45)        |
| <b>D</b>                       | 0.23 (-0.11-0.54)       | 0.10 (-0.26-0.51)       | 0.37 (-0.07-0.61)       | 0.51 (-0.03-0.55)       | -0.05 (-0.26-0.42)      |
| <b>Fp</b>                      | 0.21 (-0.19-0.73)       | 0.08 (-0.25-0.49)       | 0.68 (0.05-0.81)        | 0.18 (-0.17-0.55)       | 0.41 (-0.21-0.81)       |
| <b>BW</b>                      | -0.13 (-0.45-0.36)      | -0.18 (-0.51-0.16)      | 0.06 (-0.24-0.55)       | -0.14 (-0.45-0.26)      | -0.10 (-0.45-0.49)      |
| <b>Fc</b>                      | 0.71 (0.43-0.92)        | 0.58 (0.22-0.74)        | 0.91 (0.74-0.94)        | 0.64 (0.43-0.84)        | 0.88 (0.17-0.94)        |

Data presented as median (IQR) within-subject Spearman's correlation coefficients between P<sub>1</sub> cough sound and cough flow (a) or oesophageal pressure (b). Peak cough flow normalised to predicted peak expiratory flow. PW: power; Ep: peak energy; RT: rise time; D: duration; Fp: peak frequency; BW: bandwidth; Fc: centroid frequency.

**Table 3. The relationship between P<sub>1-3</sub> cough sound, flow and oesophageal pressure**

a) Flow

| P <sub>1-3</sub> sound parameter | All subjects            | All females             | All males               | Chronic coughers        | Controls                |
|----------------------------------|-------------------------|-------------------------|-------------------------|-------------------------|-------------------------|
| <b>PW</b>                        | <b>0.82 (0.60-0.90)</b> | <b>0.80 (0.56-0.90)</b> | <b>0.85 (0.63-0.94)</b> | <b>0.79 (0.59-0.89)</b> | <b>0.83 (0.65-0.95)</b> |
| <b>Ep</b>                        | <b>0.81 (0.56-0.90)</b> | <b>0.79 (0.49-0.89)</b> | <b>0.84 (0.59-0.96)</b> | <b>0.77 (0.55-0.87)</b> | <b>0.89 (0.60-0.96)</b> |
| <b>RT</b>                        | 0.01 (-0.18-0.3)        | -0.03 (-0.25-0.29)      | 0.16 (-0.18-0.60)       | -0.05 (-0.18-0.27)      | 0.27 (-0.21-0.56)       |
| <b>D</b>                         | 0.60 (0.23-0.82)        | 0.59 (0.23-0.78)        | 0.64 (0.22-0.84)        | 0.58 (0.24-0.77)        | 0.66 (0.23-0.83)        |
| <b>Fp</b>                        | 0.35 (0.07-0.53)        | 0.16 (-0.21-0.43)       | 0.39 (0.27-0.63)        | 0.34 (0.07-0.53)        | 0.38 (0.03-0.57)        |
| <b>BW</b>                        | 0.05 (-0.16-0.35)       | -0.08 (-0.38-0.10)      | 0.30 (0.21-0.38)        | -0.03 (-0.21-0.28)      | 0.22 (-0.02-0.45)       |
| <b>Fc</b>                        | 0.63 (0.26-0.79)        | 0.41 (0.07-0.79)        | 0.67 (0.52-0.78)        | 0.64 (0.35-0.79)        | 0.57 (0.11-0.77)        |

b) Oesophageal pressure

| P <sub>1-3</sub> sound parameter | All subjects            | All females             | All males               | Chronic coughers        | Controls                |
|----------------------------------|-------------------------|-------------------------|-------------------------|-------------------------|-------------------------|
| <b>PW</b>                        | <b>0.85 (0.65-0.91)</b> | <b>0.85 (0.65-0.89)</b> | <b>0.90 (0.63-0.96)</b> | <b>0.85 (0.59-0.89)</b> | <b>0.88 (0.67-0.95)</b> |
| <b>Ep</b>                        | <b>0.85 (0.58-0.93)</b> | <b>0.82 (0.58-0.88)</b> | <b>0.93 (0.49-0.97)</b> | <b>0.82 (0.49-0.88)</b> | <b>0.90 (0.58-0.97)</b> |
| <b>RT</b>                        | 0.05 (-0.33-0.53)       | -0.05 (-0.35-0.45)      | 0.20 (-0.21-0.65)       | -0.06 (-0.35-0.32)      | 0.38 (-0.20-0.70)       |
| <b>D</b>                         | 0.70 (0.47-0.84)        | 0.72 (0.45-0.82)        | 0.70 (0.59-0.85)        | 0.64 (0.45-0.80)        | 0.76 (0.52-0.85)        |
| <b>Fp</b>                        | 0.36 (0.12-0.60)        | 0.16 (-0.11-0.53)       | 0.43 (0.23-0.73)        | 0.31 (0.16-0.56)        | 0.39 (0.09-0.62)        |
| <b>BW</b>                        | 0.06 (-0.13-0.39)       | -0.05 (-0.24-0.21)      | 0.32 (0.00-0.46)        | -0.06 (-0.30-0.28)      | 0.29 (-0.03-0.43)       |
| <b>Fc</b>                        | 0.68 (0.48-0.82)        | 0.60 (0.23-0.77)        | 0.69 (0.60-0.87)        | 0.69 (0.31-0.79)        | 0.66 (0.60-0.86)        |

Data presented as median (IQR) within-subject Spearman's correlation coefficients between P<sub>1-3</sub> cough sound and cough flow (a) or oesophageal pressure (b). Sound recorded with free-field microphone. Peak cough flow normalised to predicted peak expiratory flow. PW: power; Ep: peak energy; RT: rise time; D: duration; Fp: peak frequency; BW: bandwidth; Fc: centroid frequency.

**Table 4. The relationship between P<sub>0.5</sub> cough sound, flow and oesophageal pressure**

a) Flow

| P <sub>0.5</sub> sound parameter | All subjects       | All females        | All males          | Chronic coughers   | Controls           |
|----------------------------------|--------------------|--------------------|--------------------|--------------------|--------------------|
| <b>PW</b>                        | 0.88 (0.79-0.92)   | 0.85 (0.77-0.90)   | 0.93 (0.83-0.96)   | 0.80 (0.77-0.91)   | 0.91 (0.85-0.96)   |
| <b>Ep</b>                        | 0.87 (0.79-0.91)   | 0.81 (0.78-0.87)   | 0.91 (0.84-0.95)   | 0.81 (0.76-0.90)   | 0.89 (0.82-0.95)   |
| <b>RT</b>                        | 0.23 (-0.05-0.42)  | 0.17 (-0.07-0.32)  | 0.25 (-0.05-0.51)  | 0.10 (-0.06-0.33)  | 0.27 (0.04-0.48)   |
| <b>D</b>                         | N/A                | N/A                | N/A                | N/A                | N/A                |
| <b>Fp</b>                        | 0.17 (-0.06-0.45)  | 0.27 (-0.25-0.45)  | 0.14 (-0.01-0.50)  | 0.13 (-0.05-0.40)  | 0.38 (-0.25-0.47)  |
| <b>BW</b>                        | -0.10 (-0.35-0.19) | -0.10 (-0.44-0.21) | -0.19 (-0.32-0.12) | -0.10 (-0.34-0.13) | -0.03 (-0.46-0.26) |
| <b>Fc</b>                        | 0.48 (0.19-0.78)   | 0.36 (0.16-0.79)   | 0.51 (0.21-0.79)   | 0.36 (0.18-0.61)   | 0.65 (0.19-0.81)   |

b) Oesophageal pressure

| P <sub>0.5</sub> sound parameter | All subjects       | All females        | All males          | Chronic coughers   | Controls           |
|----------------------------------|--------------------|--------------------|--------------------|--------------------|--------------------|
| <b>PW</b>                        | 0.89 (0.81-0.94)   | 0.87 (0.76-0.89)   | 0.94 (0.92-0.96)   | 0.89 (0.79-0.92)   | 0.89 (0.83-0.96)   |
| <b>Ep</b>                        | 0.89 (0.82-0.94)   | 0.84 (0.80-0.89)   | 0.94 (0.88-0.96)   | 0.88 (0.82-0.93)   | 0.89 (0.80-0.96)   |
| <b>RT</b>                        | 0.23 (-0.13-0.50)  | 0.11 (-0.24-0.37)  | 0.25 (-0.11-0.56)  | 0.11 (-0.19-0.50)  | 0.25 (0.01-0.52)   |
| <b>D</b>                         | N/A                | N/A                | N/A                | N/A                | N/A                |
| <b>Fp</b>                        | 0.26 (-0.11-0.46)  | 0.32 (-0.14-0.47)  | 0.13 (-0.04-0.55)  | 0.23 (-0.10-0.42)  | 0.30 (-0.14-0.53)  |
| <b>BW</b>                        | -0.15 (-0.43-0.24) | -0.13 (-0.46-0.32) | -0.19 (-0.39-0.12) | -0.19 (-0.41-0.18) | -0.03 (-0.48-0.32) |
| <b>Fc</b>                        | 0.53 (0.25-0.80)   | 0.50 (0.25-0.79)   | 0.65 (0.24-0.82)   | 0.50 (0.28-0.71)   | 0.61 (0.18-0.87)   |

Data presented as median (IQR) within-subject Spearman's correlation coefficients between P<sub>0.5</sub> cough sound and cough flow (a) or oesophageal pressure (b). Sound recorded with free-field microphone. Peak cough flow normalised to predicted peak expiratory flow. PW: power; Ep: peak energy; RT: rise time; D: duration; Fp: peak frequency; BW: bandwidth; Fc: centroid frequency.

**Table 5. Repeatability of cough sound measures during maximum voluntary cough**

|                                            | ICC<br>(2-way average) | P-value |
|--------------------------------------------|------------------------|---------|
| <b>Phase 1, P<sub>1</sub></b>              |                        |         |
| <b>PW</b>                                  | 0.93                   | <0.001  |
| <b>Ep</b>                                  | 0.94                   | <0.001  |
| <b>Constant time 0.5s, P<sub>0.5</sub></b> |                        |         |
| <b>PW</b>                                  | 0.93                   | <0.001  |
| <b>Ep</b>                                  | 0.94                   | <0.001  |

Data presented as intraclass correlation coefficients (ICC). Sound recorded with free-field microphone. PW: power; Ep: peak energy.

**Table 6. The impact of microphone position on cough sound power**

|               | <b>Cough sound power</b> | <b>P-value vs Centre</b> |
|---------------|--------------------------|--------------------------|
| <b>Centre</b> | 55.8 ± 4.3               | -                        |
| <b>Top</b>    | 53.3 ± 5.3               | 0.004                    |
| <b>Bottom</b> | 48.8 ± 5.6               | <0.001                   |
| <b>Left</b>   | 54.0 ± 4.9               | 0.002                    |
| <b>Right</b>  | 53.1 ± 4.8               | <0.001                   |

Data presented as mean ± SD and paired t-test p-values. Data is for P<sub>1</sub> sound power (arbitrary units) recorded with free-field microphone. See online supplement Figure 1 for depiction of microphone positions.

**Table 7. Individual correlation coefficients between cough sound and subjective cough strength visual analogue score**

| Sound parameter | Subject      |              |             |              |              |              |              |              |
|-----------------|--------------|--------------|-------------|--------------|--------------|--------------|--------------|--------------|
|                 | 1            | 2            | 3           | 4            | 5            | 6            | 7            | 8            |
| <b>PW</b>       | <b>0.85*</b> | <b>0.67*</b> | <b>0.38</b> | <b>0.82*</b> | <b>0.99*</b> | <b>0.73*</b> | <b>0.89*</b> | <b>0.98*</b> |
| <b>Ep</b>       | <b>0.70*</b> | <b>0.62</b>  | <b>0.43</b> | <b>0.77*</b> | <b>0.98*</b> | <b>0.84*</b> | <b>0.88*</b> | <b>0.95*</b> |
| <b>RT</b>       | 0.44         | -0.09        | 0.12        | 0.78*        | 0.90*        | -0.3         | 0.77*        | 0.14         |
| <b>D</b>        | 0.78*        | 0.15         | 0.41        | 0.66*        | 0.36         | 0.12         | 0.81*        | 0.54         |
| <b>Fp</b>       | 0.25         | 0.33         | 0.83*       | 0.32         | 0.76*        | 0.24         | 0.55*        | -0.16        |
| <b>BW</b>       | -0.64*       | 0.31         | 0.22        | -0.15        | 0.26         | -0.03        | 0.31         | -0.21        |
| <b>Fc</b>       | 0.15         | 0.24         | 0.90*       | 0.18         | 0.65*        | 0.81*        | 0.89*        | -0.56        |

Data presented as Spearman correlation coefficients between cough sound and cough strength visual analogue score (VAS) in eight patients with chronic cough. Sound recorded with free field microphone and measures derived from P<sub>1</sub> time window. \*: p<0.05.
