# Supplementary material for: Sound: a non-invasive measure of cough intensity
Source: PubMed Central journal article supplement — BMJ Open Respir Res. 2017 May 12;4(1):e000178. doi: 10.1136/bmjresp-2017-000178 (PMC5501240; doi:10.1136/bmjresp-2017-000178), 2017-05-12
Supplement: bmjresp-2017-000178supp003.pdf [file bmjresp-2017-000178supp003.pdf]

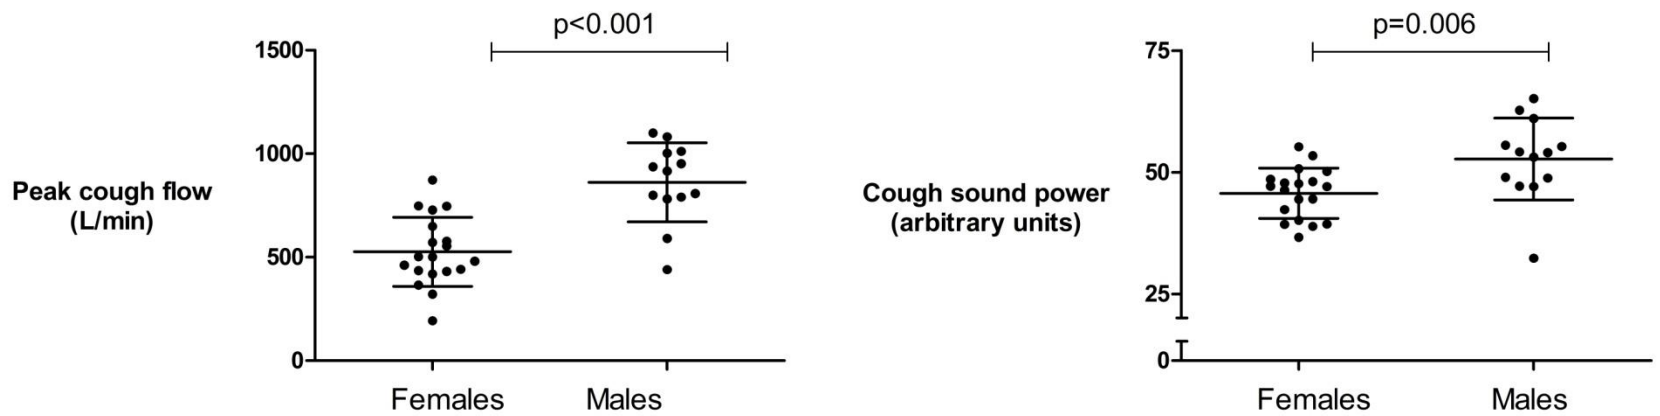

**Supplementary Figure 2. Gender differences in cough flow and sound during maximum voluntary cough.** Data presented as mean  $\pm$  SD. Cough sound power (arbitrary units) calculated from phase 1 time window ( $P_1$ ) from free-field microphone.
